# Supplementary material for: Exploitation of mixed-valency chemistry for designing a monolayer with double ferroelectricity and triferroic couplings
Source: Royal Society of Chemistry journal article supplement (doi:10.1039/d3nr02216a), 2023-01-01
Supplement: d3nr02216a1.pdf [file d3nr02216a1.pdf]

## Supplementary data

### Exploitation of Mixed-Valency Chemistry for Designing Monolayer with Double Ferroelectricity and Triferroic Couplings

Yaxin Gao,<sup>1,2</sup> Xiao Cheng Zeng<sup>3\*</sup>, Menghao Wu<sup>2\*</sup>

<sup>1</sup>School of Physics and Mechanical Electrical & Engineering, Hubei University of Education, Wuhan, Hubei 430205, China

<sup>2</sup>School of Physics, Huazhong University of Science and Technology, Wuhan, Hubei 430074, China

<sup>3</sup>Department of Materials Science and Engineering, City University of Hong Kong, Kowloon, Hong Kong 999077, China

|                                                                                     |                                                                                     |                                                                                     |                                                                                       |                                                                                       |
|-------------------------------------------------------------------------------------|-------------------------------------------------------------------------------------|-------------------------------------------------------------------------------------|---------------------------------------------------------------------------------------|---------------------------------------------------------------------------------------|
| 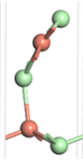  |   |   |   |   |
| 0                                                                                   | 0.032                                                                               | 0.035                                                                               | 0.055                                                                                 | 0.055                                                                                 |
|  |  |  |  |  |
| 0.060                                                                               | 0.0624                                                                              | 0.082                                                                               | 0.092                                                                                 | 0.269                                                                                 |

Figure S1. A series of low-energy 2D  $\text{Cu}_2\text{Cl}_3$  structures obtained in the extensive structural search using the Calypso code, and their relative energies (in eV/f.u. compared with the ground state).

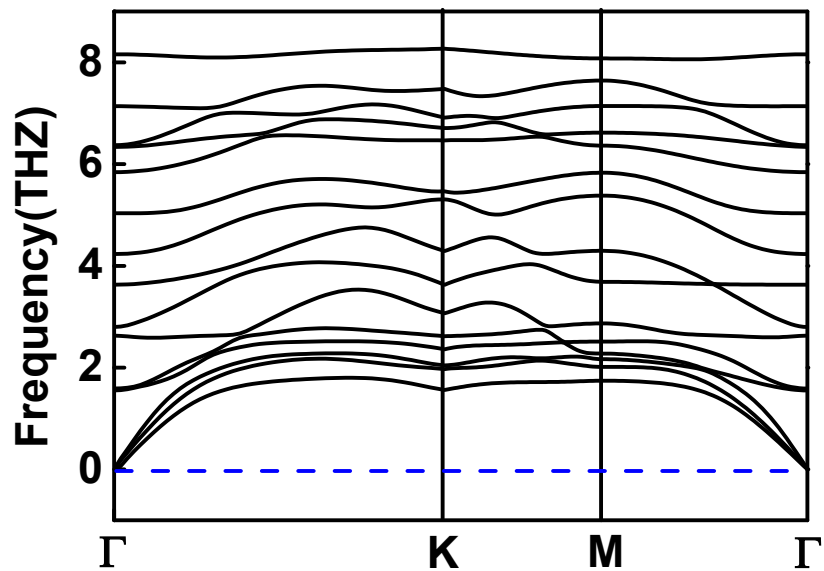

Figure S2. Phonon dispersion of  $\text{Cu}_2\text{Cl}_3$  monolayer.

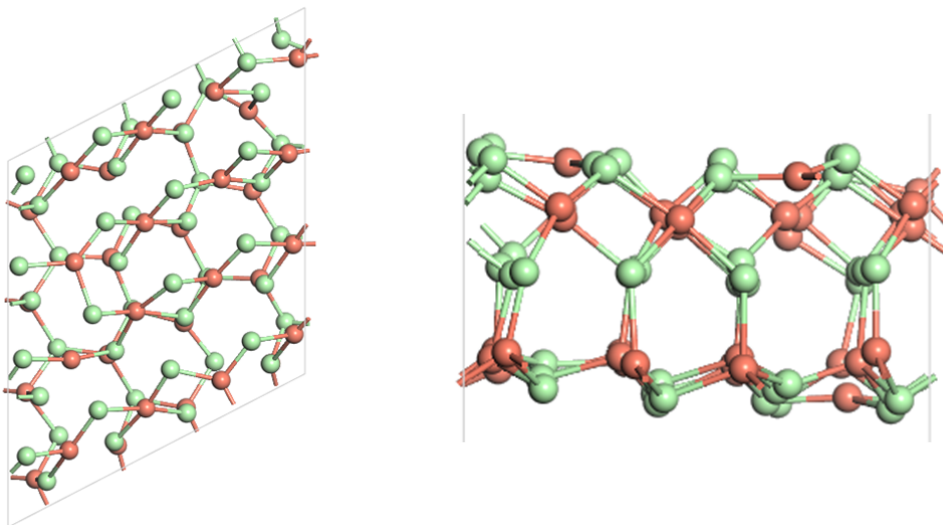

Figure S3. Snapshot of  $\text{Cu}_2\text{Cl}_3$  monolayer after AIMD simulation in the canonical ensemble at 373K for 15 ps.

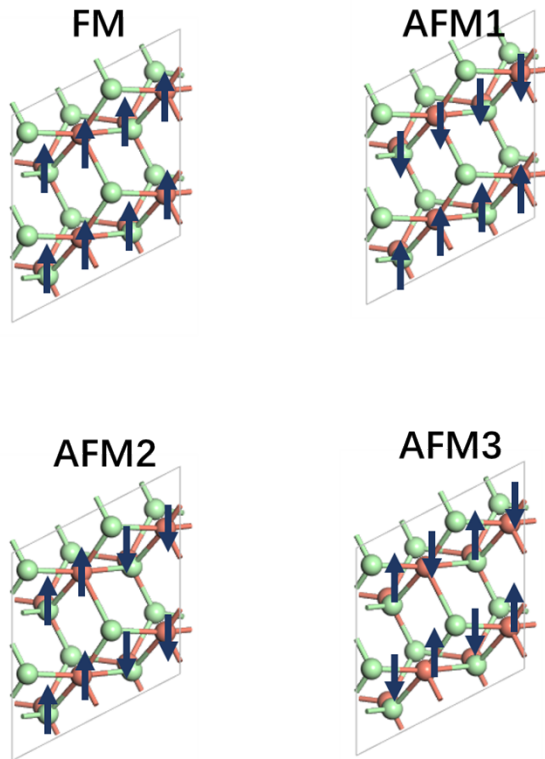

Figure S4. Different spin configurations for  $\text{Cu}_2\text{Cl}_3$  monolayer, where AFM1, AFM2, AFM3 are respectively 38, 36 and 38 meV higher in energy compared with the FM ground state.
